# Supplementary material for: Across the Gap: Geochronological and Sedimentological Analyses from the Late Pleistocene-Holocene Sequence of Goda Buticha, Southeastern Ethiopia
Source: PubMed Central journal article supplement (PMC5268652; doi:10.1371/journal.pone.0169418), 2017-01-26
Supplement: pone.0169418.s001.pdf [file pone.0169418.s001.pdf]

| Stratigraphy |        |         |        | Magmatic rock minerals |        |            |              |        | Micas     |          |           | Clays           |         | Carbonates |                   | Phosphates |             |        | Evaporites |        |         |            | Ca-oxalates |      |
|--------------|--------|---------|--------|------------------------|--------|------------|--------------|--------|-----------|----------|-----------|-----------------|---------|------------|-------------------|------------|-------------|--------|------------|--------|---------|------------|-------------|------|
| Complex      | Layers | Samples | Z (cm) | Hornblende             | Quartz | Orthoclase | Plagioclases | Rutile | Muscovite | Chlorite | Kaolinite | Montmorillonite | Calcite | Dolomite   | Carbonate-apatite | Dittmarite | Whitlockite | Gypsum | Anhydrite  | Halite | Sylvite | Weddellite | Whewellite  |      |
| Complex I    | Ia3    | S2      | 210.6  | -                      | 24.1   | 6.8        | 23.9         | -      | 13.4      | ++       | -         | -               | 9.3     | -          | ++                | -          | ++          | -      | 7.6        | ++     | +       | -          | -           |      |
|              | Id     | OSL9    | 191.6  | ++                     | 9.7    | 7.6        | 21.3         | -      | 14        | -        | -         | -               | 15.6    | -          | ++                | -          | ++          | -      | 16.1       | ++     | +       | -          | -           |      |
|              | Ie     | S3      | 188.5  | -                      | 10     | 7.7        | 25.3         | -      | 11.5      | -        | -         | -               | 13      | ++         | 6.3               | -          | 5.8         | 6.9    | 8.3        | ++     | +       | -          | -           |      |
|              | If     | S6      | 189.4  | -                      | 12.7   | -          | -            | -      | -         | -        | -         | -               | -       | 75.8       | -                 | ++         | -           | 5.7    | -          | -      | ++      | +          | -           | -    |
|              |        | OSL8    | 188.2  | -                      | 9      | ++         | -            | -      | -         | 7        | -         | -               | -       | 64.6       | -                 | ++         | 8.6         | ++     | -          | -      | +       | +          | -           | -    |
|              | Ig     | S4      | 181.5  | -                      | 9.5    | 5.7        | 32.5         | -      | -         | -        | -         | -               | -       | 30.6       | -                 | 7.7        | -           | 5.3    | -          | -      | ++      | 6.5        | -           | -    |
| Ih           | S8     | 182.5   | -      | 5.9                    | 6.9    | 23.9       | -            | 10     | ++        | -        | -         | -               | ++      | -          | ++                | 19.1       | ++          | -      | -          | ++     | +       | ++         | 15.3        |      |
| Complex II   | Ila    | OSL7    | 172.5  | 5.6                    | 20.6   | -          | 22.8         | -      | 10.7      | ++       | -         | -               | 21.5    | -          | ++                | -          | -           | -      | -          | +      | +       | ++         | 8.4         |      |
|              | Ilb    | OSL6    | 166    | 5.2                    | 16.4   | -          | 33.7         | -      | 10.1      | -        | -         | -               | 21.3    | -          | ++                | -          | -           | -      | -          | +      | +       | ++         | 6.1         |      |
|              |        | S9      | 165.9  | ++                     | 22.1   | -          | 28.9         | -      | 10        | -        | -         | ++              | 11.7    | -          | ++                | ++         | ++          | -      | -          | +      | ++      | ++         | 5.9         |      |
|              | Ilc    | S10     | 156.9  | -                      | 12.3   | -          | 21.3         | -      | -         | -        | -         | -               | -       | 15.9       | -                 | 9.6        | 12          | -      | -          | -      | ++      | +          | 14.5        | 12.3 |
|              |        | OSL5    | 145.9  | 6.1                    | 22.4   | -          | 23.1         | -      | 12.2      | -        | -         | -               | -       | 29.7       | -                 | ++         | -           | -      | -          | ++     | +       | -          | -           |      |
|              |        | S12     | 141.5  | 6.3                    | 13.6   | 5.3        | 32.8         | -      | 11.3      | ++       | ++        | -               | -       | 17.9       | -                 | ++         | -           | -      | ++         | +      | +       | -          | -           |      |
|              |        | S11     | 129.7  | -                      | 25     | ++         | 18.8         | -      | 9.2       | -        | -         | -               | -       | 14.8       | -                 | ++         | -           | 6.9    | 17.7       | -      | +       | +          | -           | -    |
|              |        | S14     | 115.5  | ++                     | 9.3    | ++         | 21.4         | -      | 10.9      | ++       | ++        | -               | -       | 10.6       | -                 | ++         | -           | -      | 30.6       | -      | +       | +          | -           | -    |
|              |        | S13     | 112.5  | -                      | 13     | -          | 23.5         | -      | 9.9       | ++       | ++        | -               | -       | 29.3       | -                 | ++         | -           | -      | 15.6       | -      | +       | +          | -           | -    |
|              | IId    | OSL4    | 104.3  | ++                     | 8.9    | -          | 27.3         | -      | 11.1      | -        | -         | -               | -       | ++         | -                 | ++         | -           | -      | 39.8       | -      | +       | +          | -           | -    |
|              |        | S15     | 86.8   | -                      | 15     | ++         | 21.7         | -      | 10        | -        | ++        | ++              | 25      | -          | -                 | -          | -           | -      | 17.3       | -      | +       | +          | -           | -    |
|              | IIe    | S20     | 46.6   | -                      | 7.7    | 7.6        | 17.4         | -      | 9.7       | -        | ++        | -               | -       | 20.3       | -                 | -          | -           | -      | 40.6       | -      | +       | +          | -           | -    |
|              |        | S17     | 73.2   | -                      | 17.2   | 6.8        | 29.3         | -      | 13.8      | -        | -         | ++              | ++      | -          | 9.9               | -          | 8.7         | 11.6   | -          | ++     | +       | -          | -           |      |
|              |        | OSL3    | 67.6   | ++                     | 13     | 7.7        | 14.9         | -      | 11.5      | -        | -         | -               | ++      | -          | ++                | -          | -           | 49.7   | -          | +      | +       | -          | -           |      |
|              | IIIf   | OSL2    | 41.3   | -                      | 9.2    | -          | 15.2         | ++     | 12.1      | -        | ++        | -               | -       | 6.5        | -                 | 5.2        | -           | -      | 44.3       | -      | +       | +          | -           | -    |
| S19          |        | 35.3    | ++     | 12.5                   | -      | 27.5       | -            | 11.4   | ++        | -        | -         | -               | 12.7    | -          | ++                | -          | 8.3         | 17.3   | -          | +      | +       | -          | -           |      |
| S21          |        | 0.8     | -      | 13                     | 5.7    | 35.3       | -            | 8.7    | ++        | ++       | -         | -               | 11.4    | -          | ++                | -          | -           | 23.3   | -          | +      | +       | -          | -           |      |
| OSL1         |        | 0       | -      | 13.5                   | 6.9    | 15.6       | -            | 11.4   | ++        | -        | -         | -               | 15.8    | -          | ++                | -          | -           | 37.9   | -          | +      | +       | -          | -           |      |

Table S1
