# Supplementary material for: Across the Gap: Geochronological and Sedimentological Analyses from the Late Pleistocene-Holocene Sequence of Goda Buticha, Southeastern Ethiopia
Source: PubMed Central journal article supplement (PMC5268652; doi:10.1371/journal.pone.0169418), 2017-01-26
Supplement: pone.0169418.s002.pdf [file pone.0169418.s002.pdf]

| Sample GDB | activities (Bq/kg)      |                       |                       |                          |                 | ratios for $^{238}\text{U}$ series |                                   |
|------------|-------------------------|-----------------------|-----------------------|--------------------------|-----------------|------------------------------------|-----------------------------------|
|            | $^{238}\text{U}$ series |                       |                       | $^{232}\text{Th}$ series | $^{40}\text{K}$ | $^{234}\text{Th}/^{226}\text{Ra}$  | $^{210}\text{Pb}/^{226}\text{Ra}$ |
|            | ( $^{234}\text{Th}$ )   | ( $^{226}\text{Ra}$ ) | ( $^{210}\text{Pb}$ ) |                          |                 |                                    |                                   |
| 9          | 15.80 ±1.26             | 20.28 ±0.40           | 14.42 ±2.01           | 9.03 ±0.36               | 2348.1 ±17.45   | 0.78 ±0.06                         | 0.71 ±0.10                        |
| 8          | 8.40 ±0.44              | 12.24 ±0.17           | 13.49 ±1.27           | 7.44 ±0.23               | 780.1 ±7.14     | 0.69 ±0.04                         | 1.10 ±0.10                        |
| 7          | 23.62 ±1.77             | 24.61 ±0.47           | 21.19 ±1.61           | 16.76 ±0.80              | 1090.3 ±9.00    | 0.96 ±0.07                         | 0.86 ±0.07                        |
| 6          | 27.88 ±2.68             | 23.84 ±0.57           | 20.54 ±2.02           | 18.07 ±1.10              | 947.5 ±9.63     | 1.17 ±0.12                         | 0.86 ±0.09                        |
| 5          | 27.78 ±2.02             | 19.92 ±0.34           | 15.70 ±1.45           | 16.30 ±0.76              | 849.2 ±7.49     | 1.39 ±0.10                         | 0.79 ±0.07                        |
| 4          | 25.37 ±1.94             | 20.71 ±0.38           | 14.48 ±1.49           | 16.69 ±0.82              | 900.7 ±8.12     | 1.23 ±0.10                         | 0.70 ±0.07                        |
| 3          | 17.29 ±1.05             | 12.89 ±0.18           | 10.94 ±1.25           | 11.89 ±0.45              | 621.6 ±6.03     | 1.34 ±0.08                         | 0.85 ±0.10                        |
| 2          | 16.00 ±0.82             | 13.08 ±0.16           | 10.03 ±1.07           | 10.42 ±0.33              | 525.6 ±4.97     | 1.22 ±0.06                         | 0.77 ±0.08                        |
| 1          | 13.23 ±0.81             | 13.67 ±0.22           | 12.55 ±1.32           | 10.37 ±0.40              | 542.9 ±6.05     | 0.97 ±0.06                         | 0.92 ±0.10                        |
