# Supplementary material for: Across the Gap: Geochronological and Sedimentological Analyses from the Late Pleistocene-Holocene Sequence of Goda Buticha, Southeastern Ethiopia
Source: PubMed Central journal article supplement (PMC5268652; doi:10.1371/journal.pone.0169418), 2017-01-26
Supplement: pone.0169418.s003.pdf [file pone.0169418.s003.pdf]

| sample<br>GDB | preheat parameters               |                  | n  | De (Gy )  |
|---------------|----------------------------------|------------------|----|-----------|
|               | natural and<br>regenerative dose | test dose        |    | CAM       |
| 9             | 240 to 300°C 10 s                | 160 cut          | 24 | 4.5 ±0.2  |
| 8             | 220 to 280°C 10 s                | 200 to 260°C cut | 25 | 5.7 ±0.5  |
| 7             | 240 to 300°C 10 s                | 220 10s          | 24 | 7.9 ±0.3  |
| 6             | 240 to 300°C 10 s                | 220 10s          | 26 | 9.9 ±0.9  |
| 4             | 240 to 300°C 10 s                | 220 10s          | 16 | 70.6 ±3.3 |
| 3             | 260°C 10s                        | 160 cut          | 5  | 85.9 ±4.5 |
| 1             | 260°C 10s                        | 160 cut          | 6  | 86.7 ±5.7 |

Table S3
