# Supplementary material for: Across the Gap: Geochronological and Sedimentological Analyses from the Late Pleistocene-Holocene Sequence of Goda Buticha, Southeastern Ethiopia
Source: PubMed Central journal article supplement (PMC5268652; doi:10.1371/journal.pone.0169418), 2017-01-26
Supplement: pone.0169418.s005.pdf [file pone.0169418.s005.pdf]

**a**

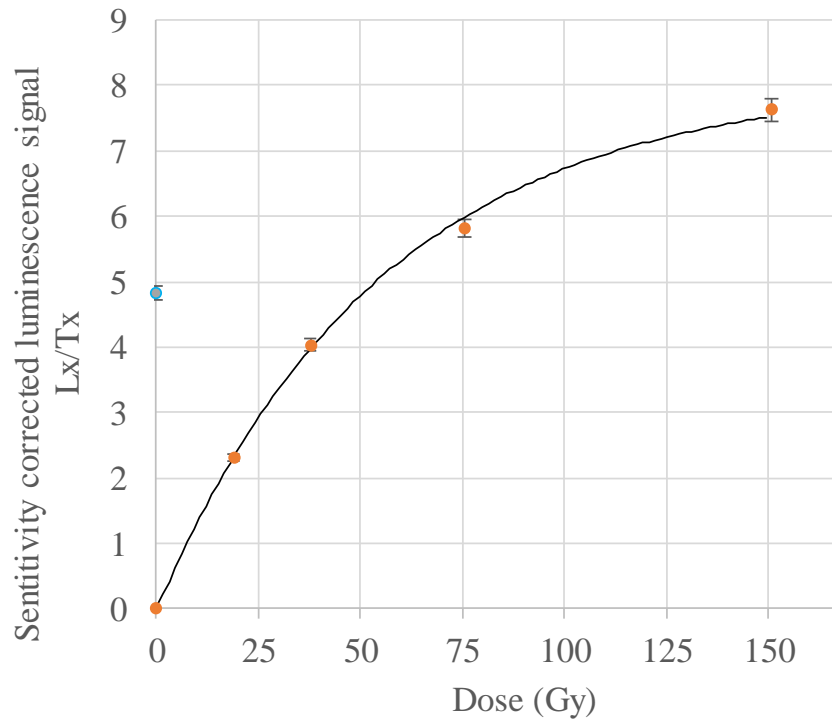

**b**

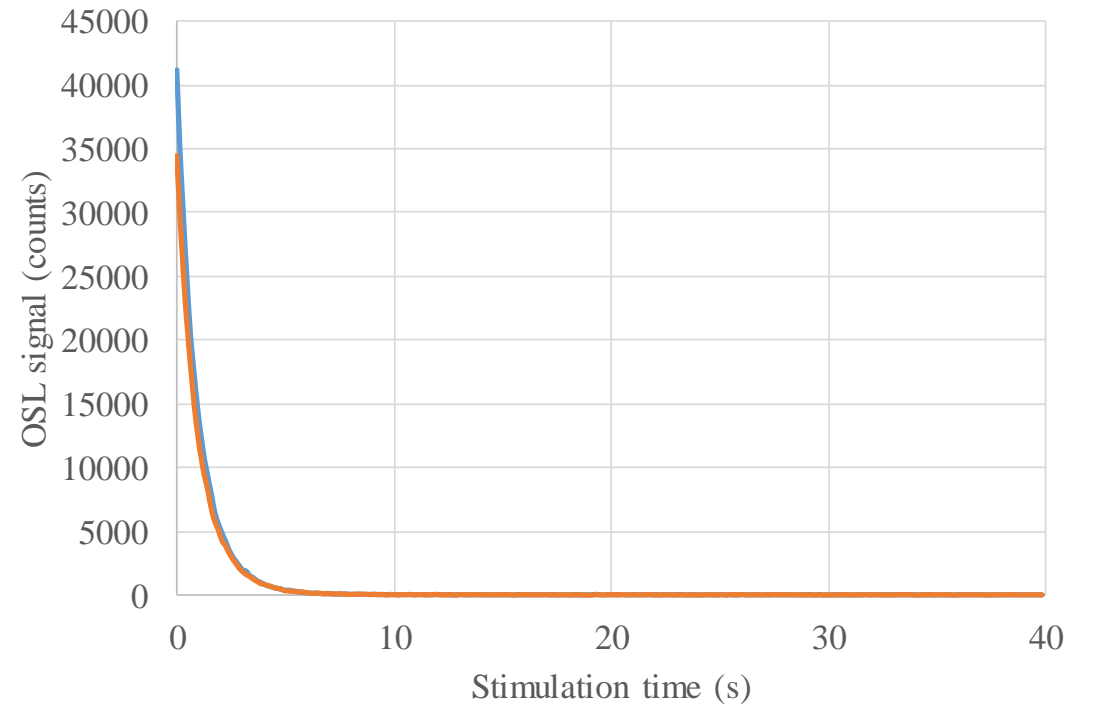

Fig S2
